# Supplementary material for: Sensitive fluorescence-based detection of magnetic field effects in photoreactions of flavins
Source: Royal Society of Chemistry journal article supplement (doi:10.1039/c5cp00723b), 2015-01-01
Supplement: c5cp00723b1.pdf [file c5cp00723b1.pdf]

## Sensitive fluorescence-based detection of magnetic field effects in photoreactions of flavins

Emrys W. Evans, Jing Li, Jonathan G. Storey, Kiminori Maeda, Kevin B. Henbest, P. J. Hore, Stuart R. Mackenzie\* and Christiane R. Timmel\*

\*To whom correspondence may be addressed: [stuart.mackenzie@chem.ox.ac.uk](mailto:stuart.mackenzie@chem.ox.ac.uk) or [christiane.timmel@chem.ox.ac.uk](mailto:christiane.timmel@chem.ox.ac.uk)

### Electronic Supplementary Information

#### Analysis of flavin photoproducts by mass spectrometry

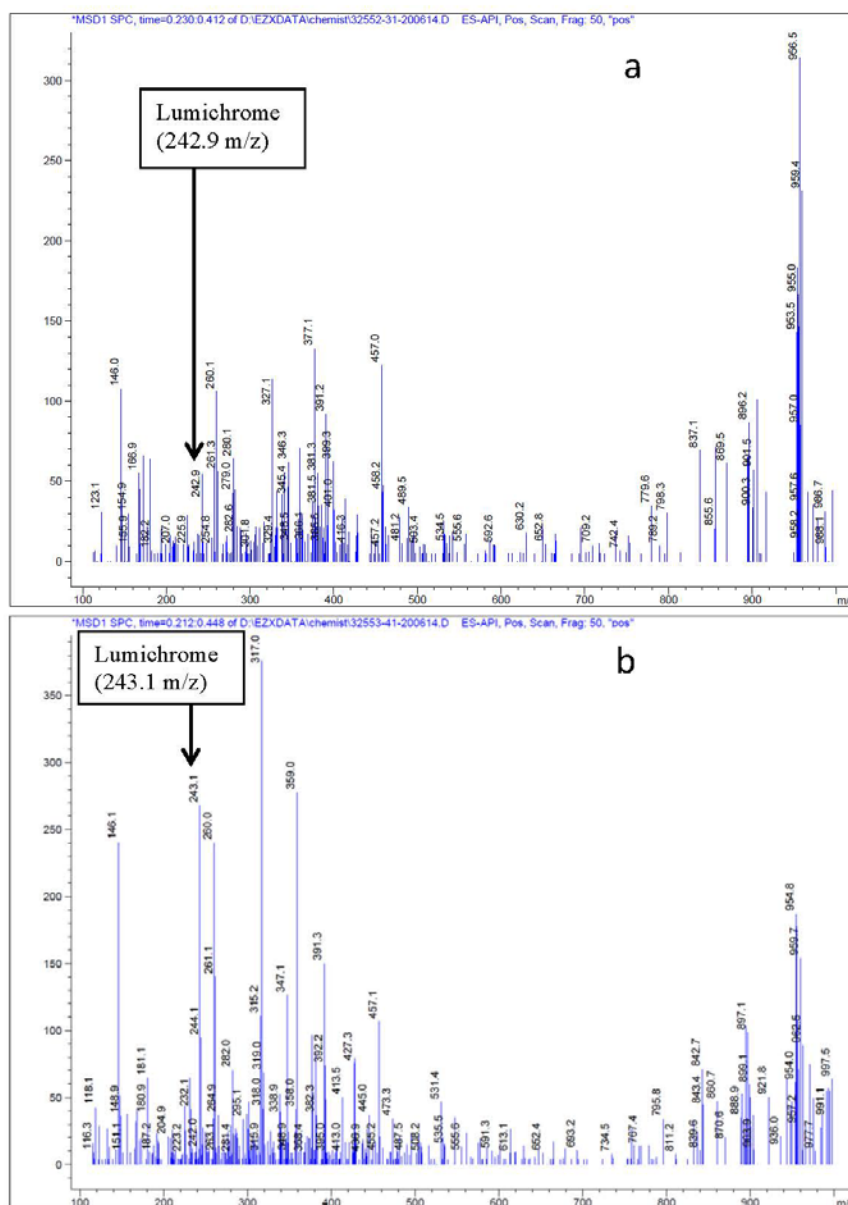

**Fig. S1:** Mass spectra before, a), and after, b), a PF MARY experiment on a static (non-flowing) sample of 10  $\mu\text{M}$  FMN + 0.5 mM HEWL, showing an increase in lumichrome content resulting from continuous photoexcitation by a 405 nm diode laser at 350 mW. Spectrum a) suggests that lumichrome is present as a minor impurity in commercial FMN. The spectra were recorded using a positive electrospray ionization Waters Premier LCT mass spectrometer.

### **Hypothesis testing for *AtCry1* MFEs**

Band-averaging over the wavelength range 500-600 nm with  $B_0 = 12.2$  mT gives an MFE of  $0.034\% \pm \text{S.E.}$   $0.007\%$  for *AtCry1* (see main text, figure 10).

A two-tailed hypothesis test of this result for the null hypothesis,  $H_0 : \text{MFE} = 0$ , and the alternative hypothesis,  $H_1 : \text{MFE} \neq 0$  yields a test statistic of 4.9 with a  $p$ -value  $< 0.001$  (assuming a normal distribution for the variance in the data as the number of measurements  $\gg 30$ ). Hence, the null hypothesis is rejected in favour of the alternative hypothesis that there is a MFE on the prompt fluorescence of the sample at the 99.9% significance level.
